# Supplementary material for: Metformin attenuates renal tubulointerstitial fibrosis via upgrading autophagy in the early stage of diabetic nephropathy
Source: PubMed Central journal article supplement (PMC8357942; doi:10.1038/s41598-021-95827-5), 2021-08-11
Supplement: 41598_2021_95827_MOESM1_ESM.pdf [file 41598_2021_95827_MOESM1_ESM.pdf]

Supplementary material of “Metformin attenuates renal tubulointerstitial fibrosis via upgrading autophagy in the early stage of diabetic nephropathy” (ID c9bc53e8-5506-497b-85a7-88a00d8ce0e4).

The un-cropped wider scans of fibronectin (FN) and Collagen I in Figure 2b:

**FN**

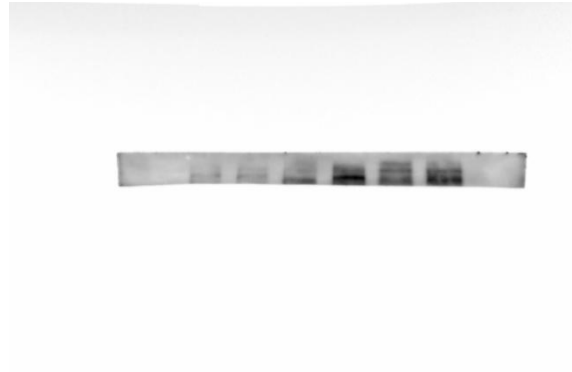

*(Original image)*

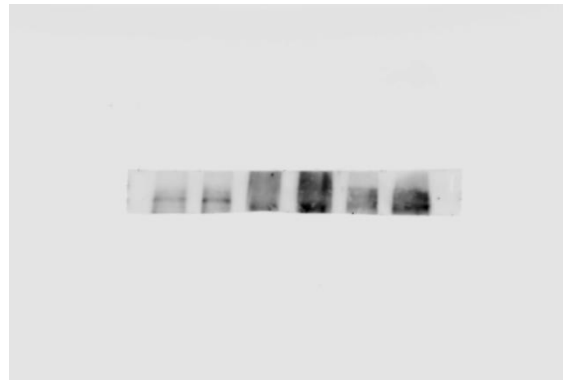

*(Different exposure 1)*

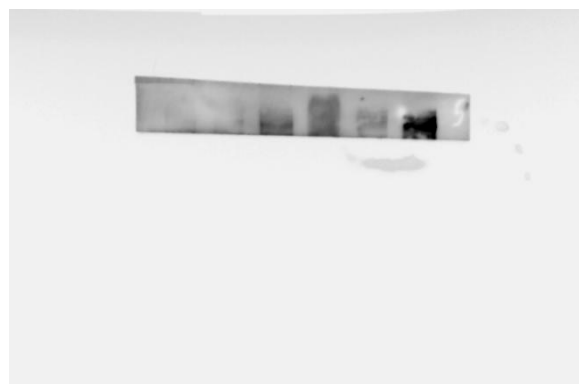

*(Different exposure 2)*

## Collagen I

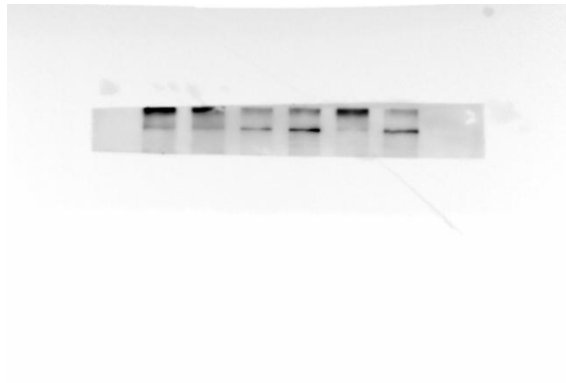

*(Original image)*

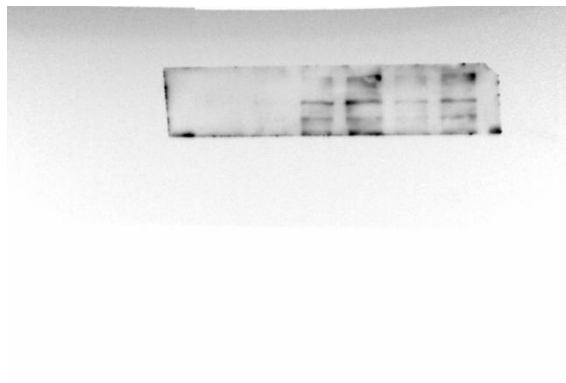

*(Different exposure 1)*

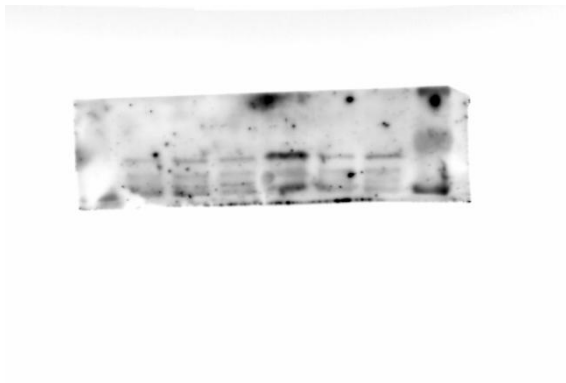

*(Different exposure 2)*

The un-cropped wider scans of LC 3 II and LC 3 I and P62 in Figure 3b:

**LC 3 II and LC 3 I**

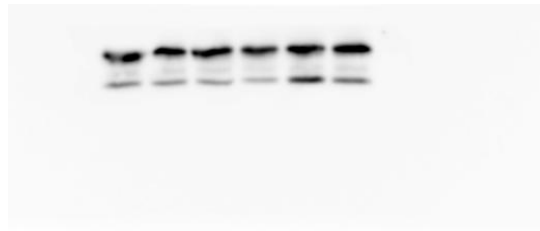

*(Original image)*

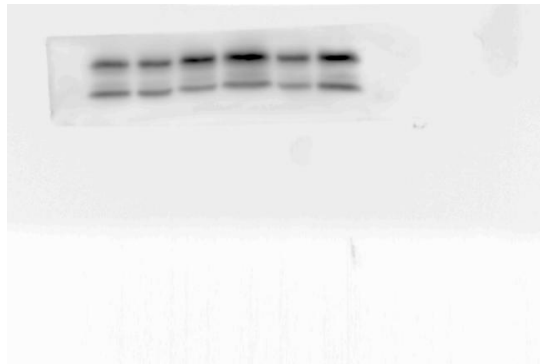

*(Different exposure 1)*

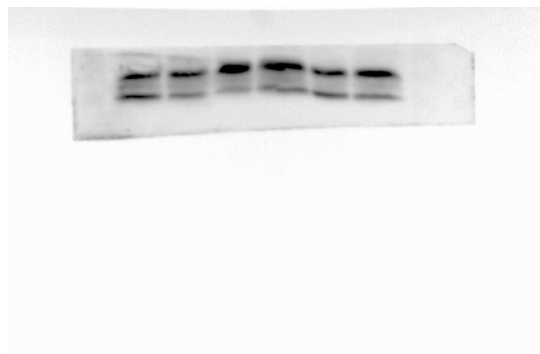

*(Different exposure 2)*

**P62**

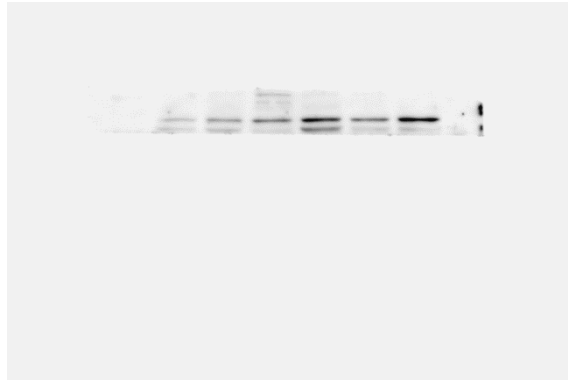

*(Original image)*

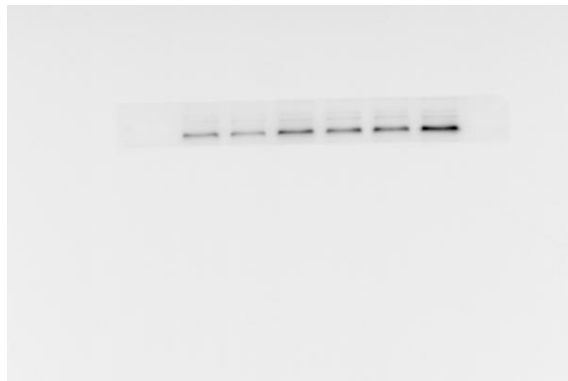

*(Different exposure 1)*

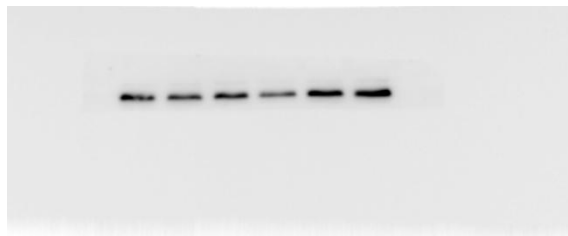

*(Different exposure 2)*

The un-cropped wider scans of p-AMPK and AMPK in Figure 5a:

**p-AMPK**

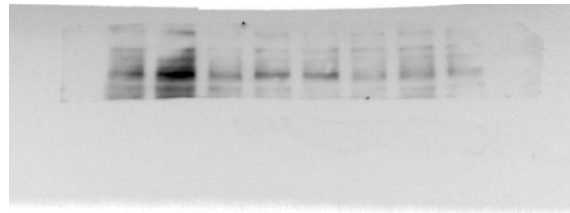

*(Original image)*

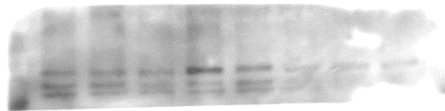

*(Different exposure 1)*

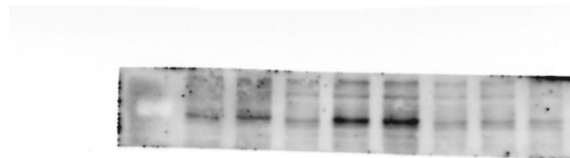

*(Different exposure 2)*

**AMPK**

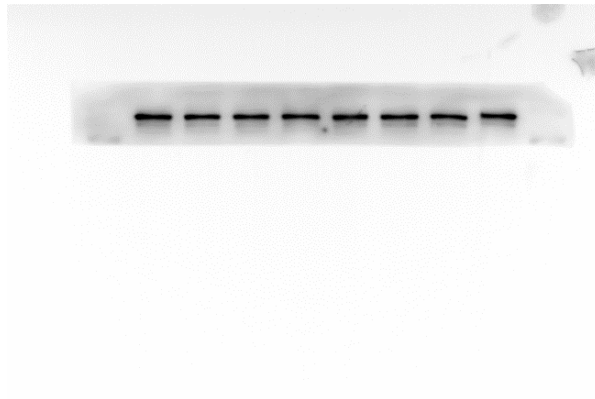

*(Original image)*

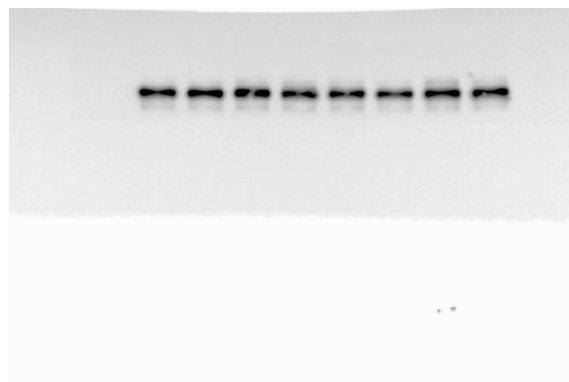

*1(Different exposure 1)*

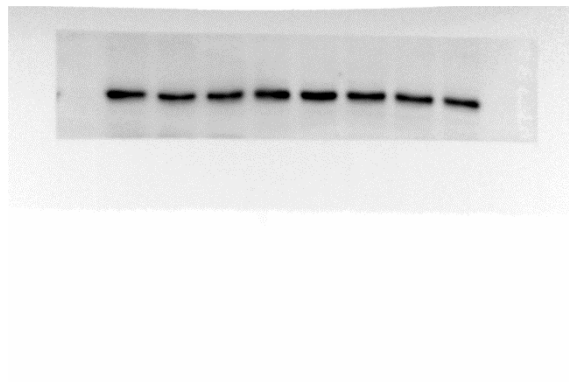

*(Different exposure 2)*

The un-cropped wider scans of LC 3 II and LC 3 I and fibronectin (FN) in Figure 5c:

**FN (left):**

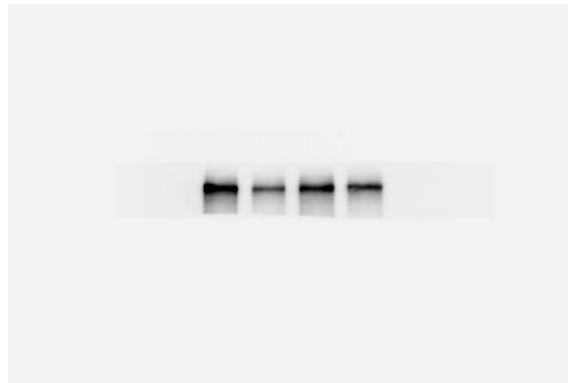

*(Original image)*

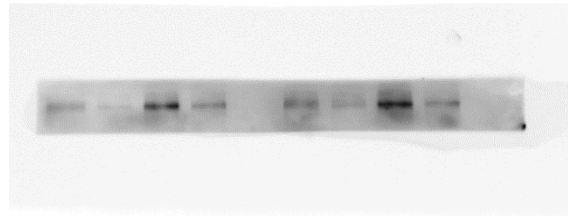

*(Different exposure 1 and 2)*

**FN (right):**

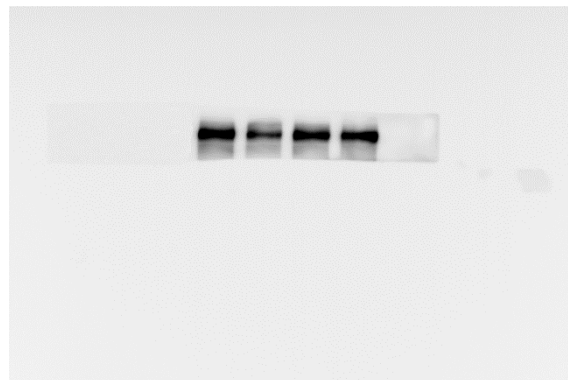

*(Original image)*

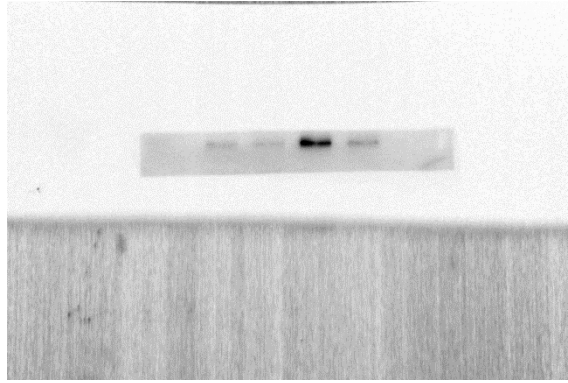

*(Different exposure 1)*

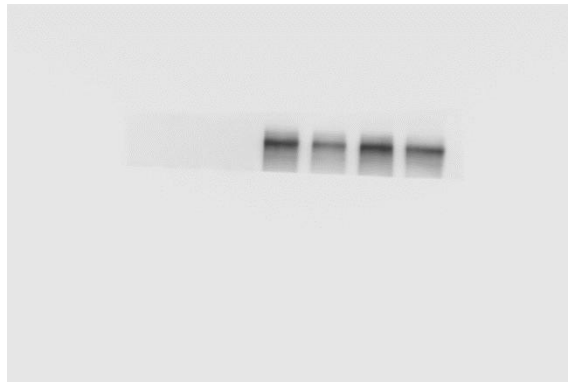

*(Different exposure 2)*

**LC 3 II and LC 3 I (left):**

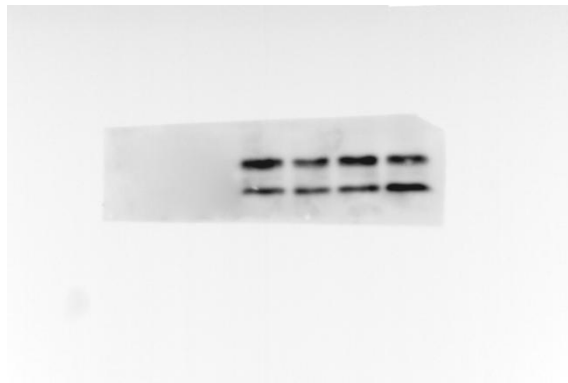

*(Original image)*



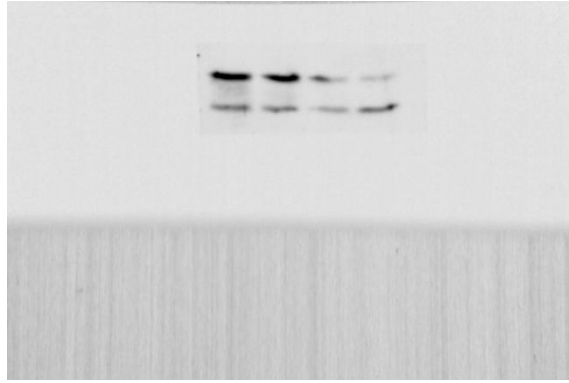

*(Different exposure 1)*

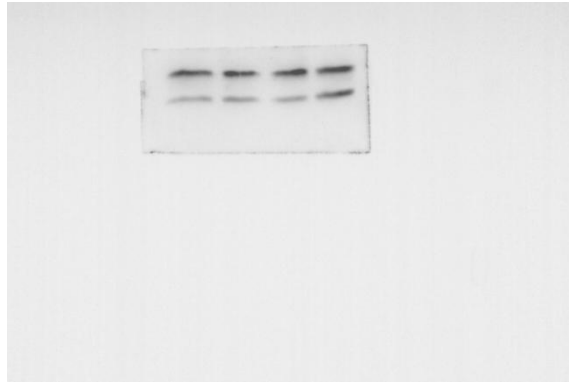

*(Different exposure 2)*

**LC 3 II and LC 3 I (right):**

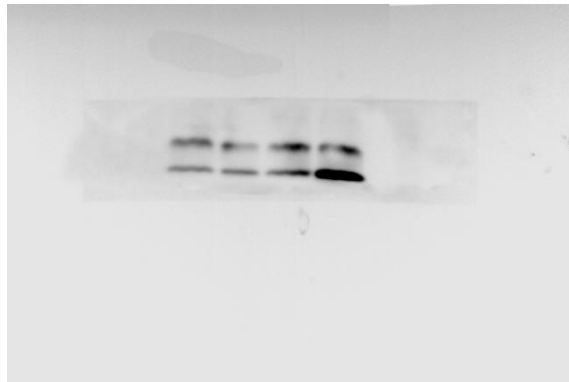

*(Original image)*

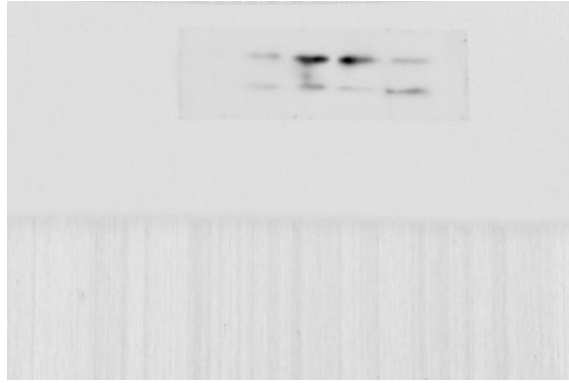

*(Different exposure 1)*

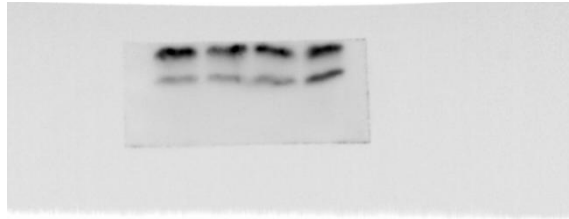

*(Different exposure 2)*

The un-cropped wider scans of E-Cadherin and  $\alpha$ -SMA in Figure 6b:

**E-cadherin**

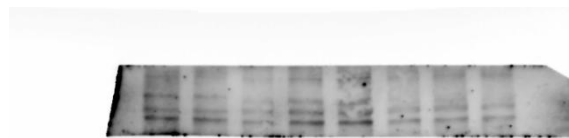

*(Original image)*

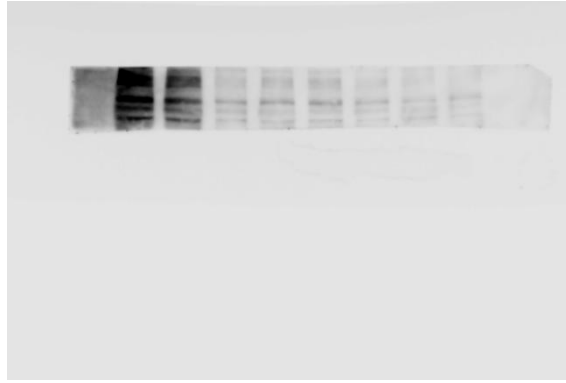

*(Different exposure 1)*

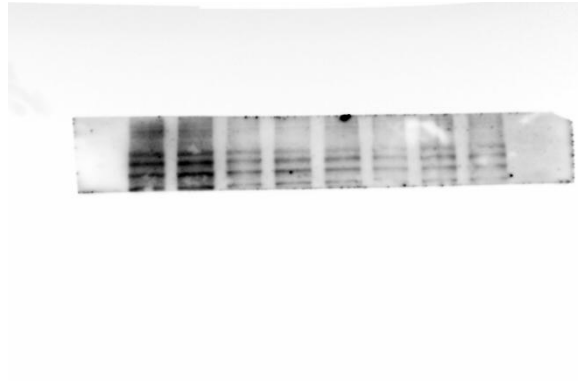

*(Different exposure 2)*

**$\alpha$ -SMA**

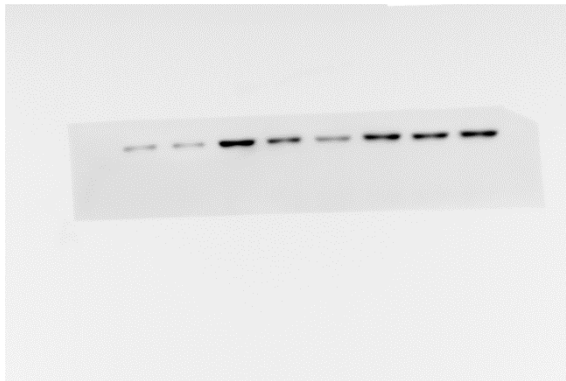

*(Original image)*

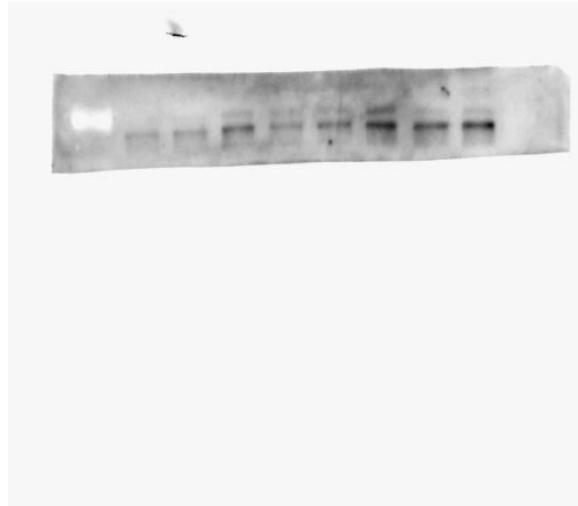

*(Different exposure 1)*

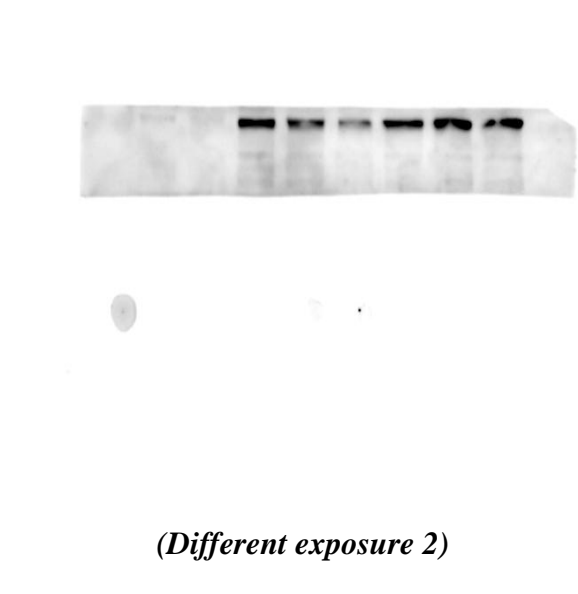

*(Different exposure 2)*

The un-cropped wider scans of  $\beta$ -actin in Figure 2b:

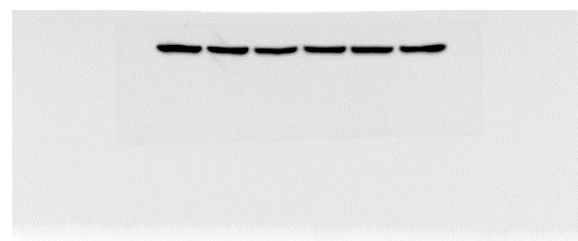

*(Original image)*

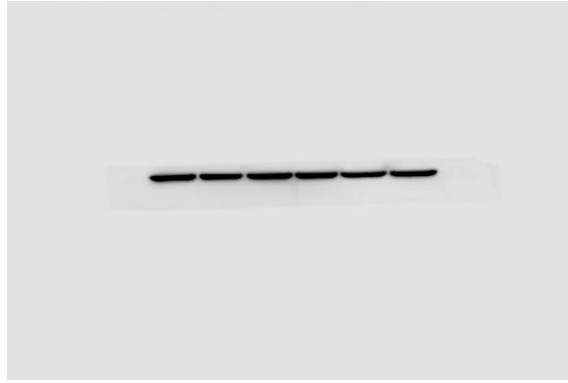

*(Different exposure 1)*

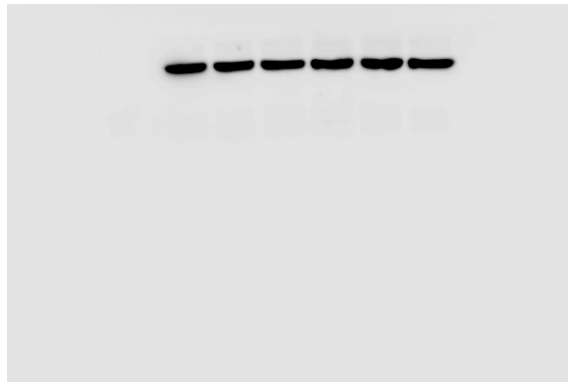

*(Different exposure 2)*

The un-cropped wider scans of  $\beta$ -actin in Figure 3b:

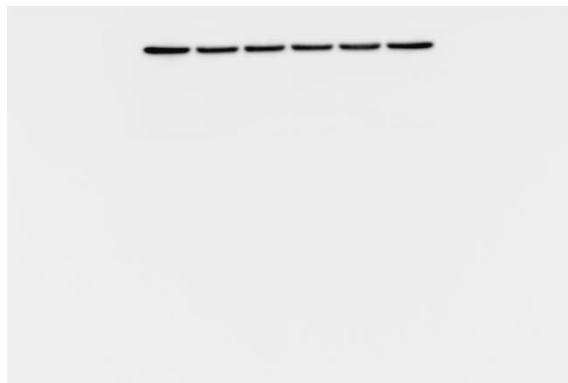

*(Original image)*

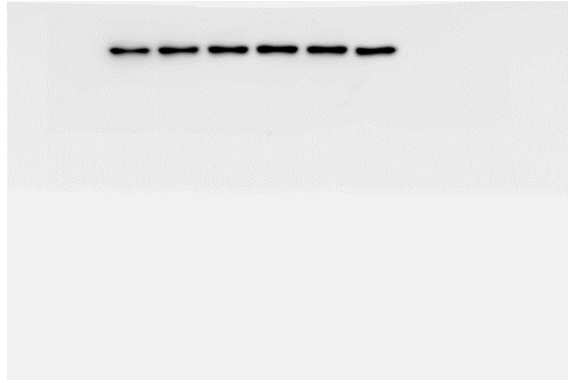

*(Different exposure 1)*

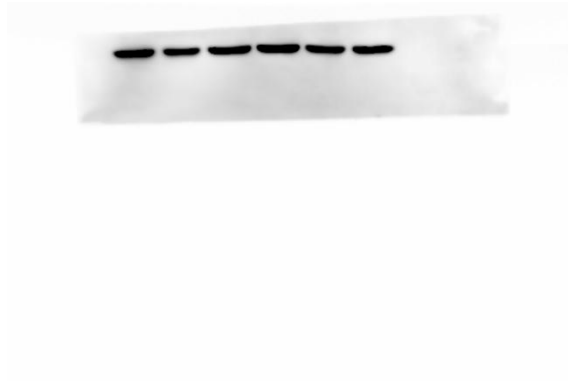

*(Different exposure 2)*

The un-cropped wider scans of  $\beta$ -actin in Figure 5a:

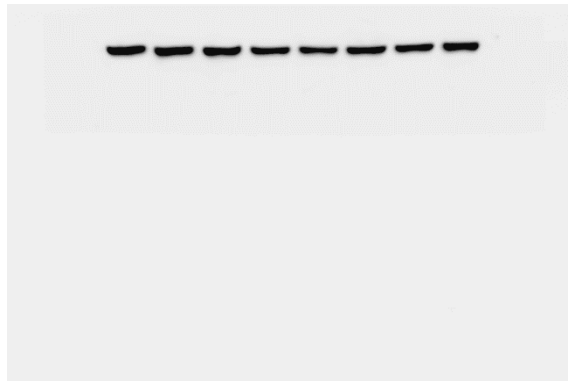

*2(Original image)*

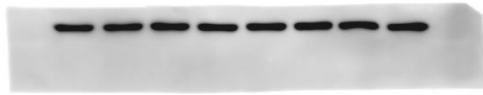

*(Different exposure 1)*

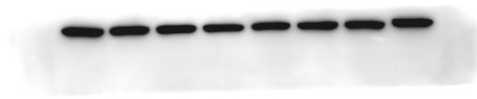

*(Different exposure 2)*

The un-cropped wider scans of  $\beta$ -actin (left) in Figure 5c:

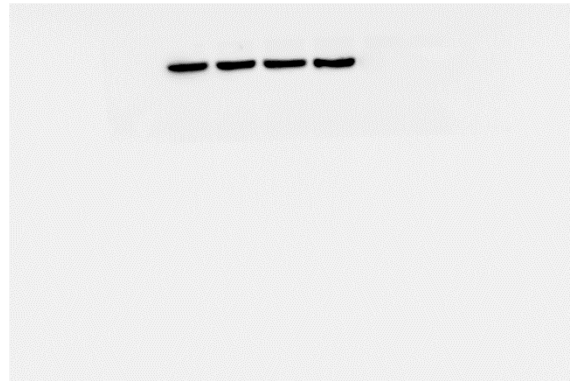

*3(Original image)*

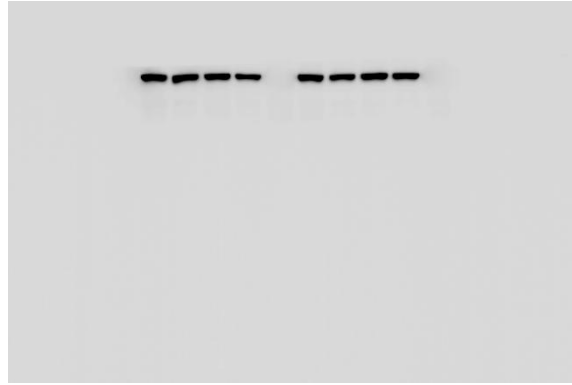

*(Different exposure 1 and 2)*

The un-cropped wider scans of  $\beta$ -actin (right) in Figure 5c:

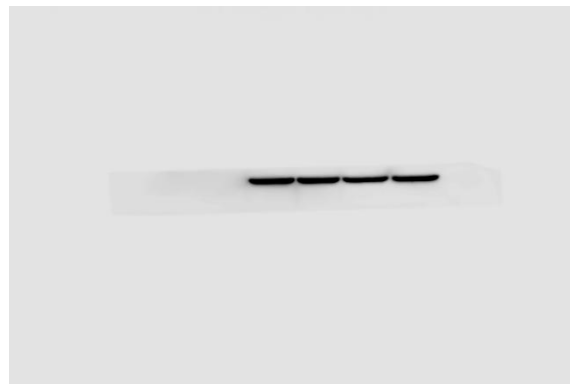

*(Original image)*

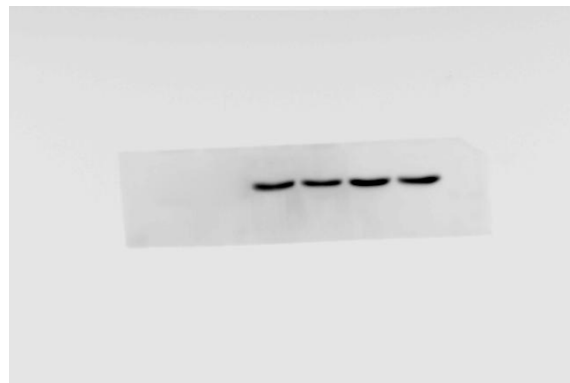

*(Different exposure 1)*



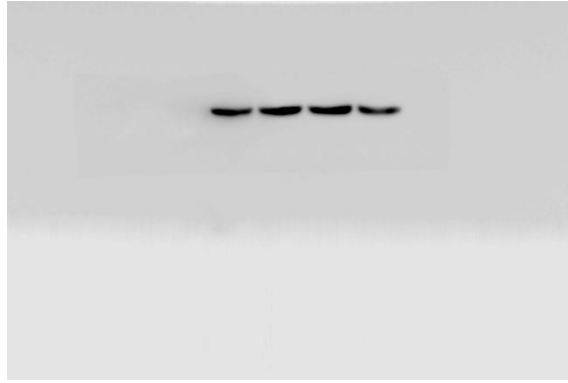

*(Different exposure 2)*

The un-cropped wider scans of  $\beta$ -actin in Figure 6b:

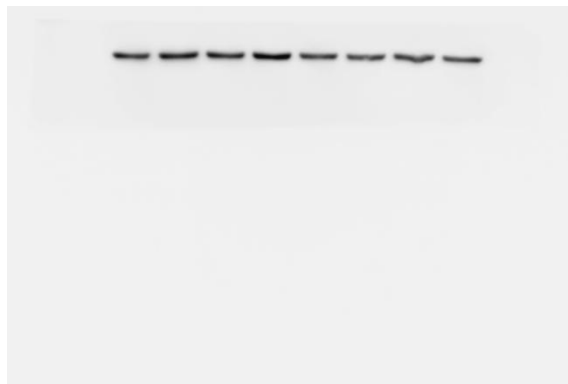

*(Original image)*

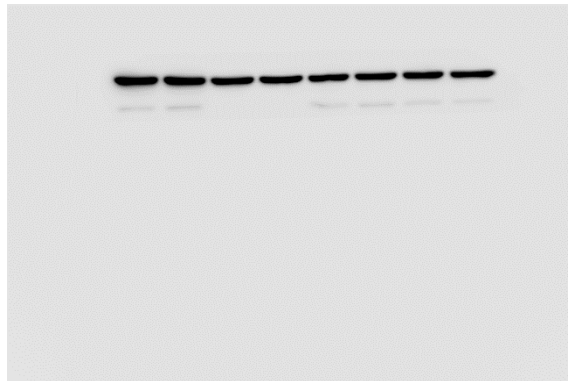

*(Different exposure 1)*

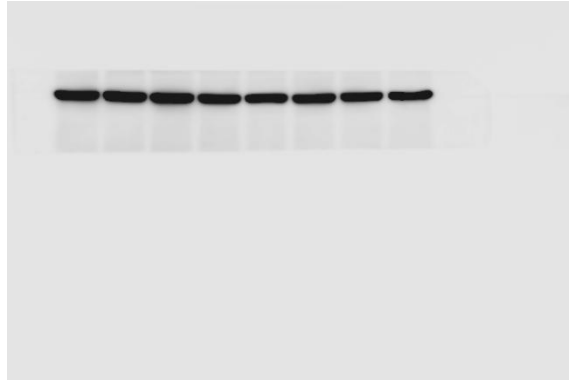

*(Different exposure 2)*
